# Supplementary material
Source: PubMed Central journal article supplement (PMC5659388)
Supplement: NIHMS867770-supplement-2.pdf [file NIHMS867770-supplement-2.pdf]

**Genome-wide exactly recurrent (n≥6) noncoding mutations in PDA**

| Nearest gene   | Patients (%) | Sequence  | Gene name/protein function                                     |
|----------------|--------------|-----------|----------------------------------------------------------------|
| <i>COX7B2</i>  | 7 (2.27)     | GTCA(T)TA | cytochrome c oxidase subunit                                   |
| <i>OSBPL9</i>  | 7 (2.27)     | ATTA(T)AT | oxysterol binding protein-like 9; cholesterol transfer protein |
| <i>WASF3</i>   | 7 (2.27)     | TTTT(A)AA | Wiskott-Aldrich syndrome protein family                        |
| <i>ZNF81</i>   | 7 (2.27)     | AATA(T)AA | zinc finger protein; transcription factor                      |
| <i>BNC2</i>    | 6 (1.95)     | TTTA(T)AA | basophilin 2; zinc finger transcription factor                 |
| <i>ELMO1</i>   | 6 (1.95)     | TTTA(T)AA | engulfment and cell motility 1; cytoskeletal rearrangement     |
| <i>GPR98</i>   | 6 (1.95)     | TCTC(A)TC | G protein-coupled receptor; central nervous system development |
| <i>MYO16</i>   | 6 (1.95)     | GCTT(C)GC | myosin XVI; actin-based motor with ATPase activity             |
| <i>PDE3B</i>   | 6 (1.95)     | ATAG(T)AG | phosphodiesterase 3B; regulates cAMP binding of RAPGEF3        |
| <i>SOX5</i>    | 6 (1.95)     | ATAG(T)AG | SRY (sex determining region Y)-box 5; transcription factor     |
| <i>TMEM232</i> | 6 (1.95)     | ATAG(T)AG | transmembrane protein 232                                      |

**Supplementary Table 1 - Exactly recurrent mutations in PDA.**

The most common exactly recurrent mutations across the patient cohort. Sequence of mutant allele in parenthesis.

**NCM overlap with known PDA genes**

| PDA gene      | CRR (# patients)    |
|---------------|---------------------|
| <i>KRAS</i>   | -                   |
| <i>TP53</i>   | -                   |
| <i>CDKN2A</i> | -                   |
| <i>SMAD4</i>  | -                   |
| <i>ARID1A</i> | -                   |
| <i>MLL3</i>   | -                   |
| <i>PIK3CA</i> | -                   |
| <i>MAP2K4</i> | -                   |
| <i>BRAF</i>   | -                   |
| <i>ZIM2</i>   | JUND (6)            |
| <i>PEG3</i>   | TAF1 (6), FOSL2 (5) |
| <i>NEB</i>    | -                   |
| <i>FLG</i>    | -                   |
| <i>TGFBR2</i> | -                   |
| <i>ATM</i>    | -                   |
| <i>HMCN1</i>  | -                   |
| <i>ACVR1B</i> | -                   |
| <i>XIRP2</i>  | -                   |
| <i>APC</i>    | -                   |
| <i>FBXW7</i>  | -                   |
| <i>RB1</i>    | -                   |
| <i>USP47</i>  | -                   |
| <i>BRCA2</i>  | -                   |
| <i>PALB2</i>  | -                   |
| <i>LKB1</i>   | -                   |
| <i>PRSS1</i>  | -                   |

**Supplementary Table 2 - Distribution of gene-proximal NCMs near known PDA genes.**  
 Analysis of the association of NCM clusters with known PDA genes.

| Multivariate Analysis                                                     |                                  |                       |         |
|---------------------------------------------------------------------------|----------------------------------|-----------------------|---------|
|                                                                           | Variable                         | Hazard Ratio (95% CI) | P Value |
| A. Clinico-pathological and<br><i>PTPRN2</i><br>(n = 254, Starting model) | Sex (Male)                       | 1.16 (0.83 – 1.62)    | 0.3933  |
|                                                                           | Lymph Node Metastases (Positive) | 1.08 (0.65 – 1.81)    | 0.7561  |
|                                                                           | Grade (G3/4)                     | 1.68 (1.19 – 2.38)    | 0.0033  |
|                                                                           | Tumor Size (> 20 mm)             | 1.90 (1.04 – 3.50)    | 0.0378  |
|                                                                           | Margin Involvement (Positive)    | 1.25 (0.87 – 1.81)    | 0.2208  |
|                                                                           | Tumor Location (Body/Tail)       | 1.71 (1.15 – 2.54)    | 0.0078  |
|                                                                           | Perineural Invasion (Positive)   | 1.48 (0.88 – 2.51)    | 0.1416  |
|                                                                           | Vascular Invasion (Positive)     | 1.65 (1.07 – 2.54)    | 0.0227  |
|                                                                           | <i>PTPRN2</i> Expression (Low)   | 1.42 (1.00 – 2.01)    | 0.0505  |
| B. Clinico-pathological and<br><i>PTPRN2</i><br>(Final model)             | Grade (G3/4)                     | 1.69 (1.21 – 2.38)    | 0.0021  |
|                                                                           | Tumor Size (> 20 mm)             | 1.98 (1.10 – 3.60)    | 0.0239  |
|                                                                           | Tumor Location (Body/Tail)       | 1.87 (1.26 – 2.75)    | 0.0017  |
|                                                                           | Vascular Invasion (Positive)     | 2.05 (1.44 – 2.92)    | <0.0001 |
|                                                                           | <i>PTPRN2</i> Expression (Low)   | 1.43 (1.00 – 2.02)    | 0.0453  |

**Supplementary Table 3 - PTPRN2 multivariate analysis.**

Multivariate analysis of clinico-pathological variables and PTPRN2 expression in the patient cohort.

| CRR    | EM Score     | CRR     | EM Score    | CRR     | EM Score    |
|--------|--------------|---------|-------------|---------|-------------|
| SUZ12  | -0.686694944 | HDAC2   | 0.150381608 | RXRA    | 0.273722674 |
| CTBP2  | -0.674670553 | E2F6    | 0.150409791 | HMG3    | 0.281526015 |
| POU5F1 | -0.56033248  | BHLHE40 | 0.151537078 | NFKB1   | 0.288817568 |
| ZNF274 | -0.245849532 | POLR3A  | 0.159325596 | ZEB1    | 0.303120139 |
| ZZZ3   | -0.161998971 | JUN     | 0.162188074 | ETS1    | 0.310574829 |
| BATF   | -0.135543815 | EBF1    | 0.163190758 | TAF7    | 0.313174867 |
| MAFF   | -0.075863388 | TRIM28  | 0.163945818 | CHD2    | 0.315050091 |
| ESR1   | -0.039131089 | TFAP2A  | 0.164300299 | JUNB    | 0.325497894 |
| NANOG  | -0.038471214 | ZNF143  | 0.169254105 | ATF3    | 0.326109056 |
| ZBTB33 | -0.030552156 | STAT1   | 0.171479031 | NRF1    | 0.326352606 |
| ZNF263 | -0.025572293 | GABPA   | 0.172425715 | POU2F2  | 0.327706868 |
| MAFK   | -0.02294752  | HSF1    | 0.176973018 | SRF     | 0.337389028 |
| REST   | -0.003580494 | PBX3    | 0.177027193 | NFE2    | 0.342471413 |
| SIRT6  | 0.002156973  | FOS     | 0.17863575  | SMARCB1 | 0.345768127 |
| RAD21  | 0.009059509  | NR3C1   | 0.178665134 | SIN3A   | 0.354604782 |
| HNF4A  | 0.02493997   | YY1     | 0.179418835 | TAF1    | 0.363204782 |
| NR2C2  | 0.030842166  | SMARCA4 | 0.187416973 | BRF1    | 0.364973559 |
| FOXA2  | 0.035231355  | SP1     | 0.189263356 | RFX5    | 0.372691206 |
| FOXA1  | 0.036020516  | IRF4    | 0.189407346 | SREBF2  | 0.380044338 |
| BCL11A | 0.040986649  | ELF1    | 0.190484821 | BDP1    | 0.396235351 |
| MEF2C  | 0.046893332  | SMARCC1 | 0.196306055 | SIX5    | 0.402922065 |
| HNF4G  | 0.047321602  | TCF4    | 0.196772009 | SP2     | 0.411373792 |
| GATA3  | 0.056356258  | EP300   | 0.198545703 | BRCA1   | 0.420438253 |
| CTCF   | 0.057809323  | PAX5    | 0.199920331 | PRDM1   | 0.421602184 |
| CEBPB  | 0.069849107  | NFYB    | 0.20623068  | E2F4    | 0.421865085 |
| TAL1   | 0.071199973  | GATA1   | 0.207466124 | IRF1    | 0.433584837 |
| SPI1   | 0.085668185  | E2F1    | 0.209186604 | BCLAF1  | 0.433812837 |
| SETDB1 | 0.093669622  | FOSL2   | 0.220324569 | MXI1    | 0.436922274 |
| ZBTB7A | 0.097578103  | USF2    | 0.221126568 | KAT2A   | 0.451063271 |
| GATA2  | 0.098239781  | TBP     | 0.227528399 | IRF3    | 0.475299075 |
| SMC3   | 0.103732676  | ESRRA   | 0.230647673 | SMARCC2 | 0.479021415 |
| MYC    | 0.103926411  | TFAP2C  | 0.231536652 | ELK4    | 0.490643603 |
| BCL3   | 0.112807799  | SREBF1  | 0.240511397 | THAP1   | 0.493514238 |
| MAX    | 0.116546688  | HDAC8   | 0.241186695 | STAT2   | 0.524018361 |
| EGR1   | 0.119910439  | TCF12   | 0.251270827 | GTF2B   | 0.544751967 |
| USF1   | 0.120445295  | CCNT2   | 0.263950123 | FAM48A  | 0.567152197 |
| CTCFL  | 0.129630002  | NFYA    | 0.267597423 | GTF2F1  | 0.669284919 |
| MEF2A  | 0.130585096  | STAT3   | 0.268609945 | WRNIP1  | 0.693109157 |
| JUND   | 0.132604078  | FOSL1   | 0.268875227 | RDBP    | 1.123049853 |

**Supplementary Table 4 - CRR expression modulation scores.**

Effect of CRR on activity of neighboring gene compared with all other genes in the genome (see Online Methods for analysis details). EM Score, expression modulation score.

## Supplementary Note

### Results

#### Somatic mutation calling

SNVs were called using BWA and GATK as previously described<sup>1</sup>. The rates and distribution of coding mutations in commonly mutated PDA genes (*KRAS*, *TP53*, *CDKN2A*, *SMAD4*, *ARID1A*) in the patient cohort was consistent with previous reports (**Supplementary Fig. 2**). We confirmed somatic status of the variants by searching for any evidence of the putative tumor variant in whole genome sequences of matched normal tissue for each patient.

#### Depletion of SNPs

Cancer mutations are depleted in accessible regulatory regions, particularly in those of the originating cell type<sup>2</sup>. Our set of SNPs was similarly depleted in DHSs from 164 cell types mapped by ENCODE and the Roadmap Epigenomics projects. The top ten most depleted DHS sets were from blood cells, for which >1.5 times fewer SNPs were present than after shuffling. Mapped cell types related to the pancreas were also depleted but inconspicuous in the broader context of many other cell types.

#### General feature of FunSeq2

The FunSeq2 pipeline filters cancer variants to exclude common polymorphisms from the 1000 Genomes project and retain those in noncoding regions. Further filters select for non-coding mutations in “sensitive” regions (those under strong negative selection), regions of high centrality in the protein-protein interaction network, ENCODE-defined regions captured by chromatin immunoprecipitation (ChIP), and mutations disrupting transcription factor binding motifs. We confirmed the somatic status of the mutations by comparing with matched normal DNA for each patient.

#### Enrichment of NCMs in CRRs

Noncoding mutations were found to be specifically enriched in certain classes of gene-proximal CRRs, including binding regions for the RNA Polymerase III Transcription Initiation Factors *BRF1* and *BDP1*, the Polycomb Repressive Complex 2 component *SUZ12*, the lysine acetyltransferase *KAT2A*, the negative elongation factor of RNA Polymerase II *RDBP*, and the transcriptional repressor *CTBP2*.

#### Discussion

The number of NCM-gene expression associations we uncover in this study is higher than that of similar whole genome cancer analyses. Several differences may account for this finding. First, we focused exclusively on a large number of samples from a single cancer type, rather than including a diverse array of cancers. As recurrent somatic NCMs are relatively uncommon (as are most coding mutations in PDA), reducing the heterogeneity of the samples allows detection of rare events. Second, we used GECCO to select those NCMs that are most likely to cause alterations in gene expression and focused on clusters of mutations within specific regulatory regions in close proximity to genes.

We provide evidence that NCMs in specific regulatory element classes are selected for during tumor evolution. These highly mutated regulatory element classes are predominantly those with the greatest impact on gene expression. Further research will

be required to uncover if these regions are actively promoting or repressing gene expression in PDA, or if they are independently associated with highly expressed or repressed genes.

### **Supplementary References**

1. Waddell, N., *et al.* Whole genomes redefine the mutational landscape of pancreatic cancer. *Nature* **518**, 495-501 (2015).
2. Polak, P., *et al.* Cell-of-origin chromatin organization shapes the mutational landscape of cancer. *Nature* **518**, 360-364 (2015).
